# Supplementary material for: Bulk single crystal growth and optoelectronic properties of the quasi-two-dimensional perovskites (CH3NH3)3Bi2X9 (X− = Br− and I−)
Source: Royal Society of Chemistry journal article supplement (doi:10.1039/d3qi02687f), 2024-01-01
Supplement: d3qi02687f1.pdf [file d3qi02687f1.pdf]

Supplementary Information:

**Bulk single crystal growth and optoelectronic properties of the quasi-two-dimensional perovskites (CH<sub>3</sub>NH<sub>3</sub>)<sub>3</sub>Bi<sub>2</sub>X<sub>9</sub> (X<sup>-</sup>=Br<sup>-</sup> and I<sup>-</sup>)**

Zhiyuan Li,<sup>a</sup> Xiangjun Wang,<sup>a</sup> Peng Zhao,<sup>b</sup> Jingquan Liu,<sup>a,\*</sup> and Xiangxin Tian<sup>a,\*</sup>

<sup>a</sup> School of Materials and Engineering, Linyi University, Linyi 276000, China.

<sup>b</sup> Sinoma Synthetic Crystals Co., Ltd., Beijing 100018, China.

**Figure S1.** The EDS measurement results of (a) MA<sub>3</sub>Bi<sub>2</sub>Br<sub>9</sub>, (b) MA<sub>3</sub>Bi<sub>2</sub>(Br<sub>0.74</sub>I<sub>0.26</sub>)<sub>9</sub>, (c) MA<sub>3</sub>Bi<sub>2</sub>(Br<sub>0.62</sub>I<sub>0.38</sub>)<sub>9</sub>, and (d) MA<sub>3</sub>Bi<sub>2</sub>I<sub>9</sub>, respectively.

**Figure S2.** XPS measurement results of MA<sub>3</sub>Bi<sub>2</sub>Br<sub>9</sub> single crystals. (a) The XPS survey of the crystal. (b)-(e) show the peaks of C, N, Bi, and Br elements, respectively.

**Figure S3.** XPS measurement results of MA<sub>3</sub>Bi<sub>2</sub>(Br<sub>0.74</sub>I<sub>0.26</sub>)<sub>9</sub> single crystals. (a) The XPS survey of the crystal. (b)-(f) show the peaks of C, N, Bi, Br, and I elements, respectively.

**Figure S4.** XPS measurement results of MA<sub>3</sub>Bi<sub>2</sub>(Br<sub>0.62</sub>I<sub>0.38</sub>)<sub>9</sub> single crystals. (a) The XPS survey of the crystal. (b)-(f) show the peaks of C, N, Bi, Br, and I elements, respectively.

**Figure S5.** XPS measurement results of MA<sub>3</sub>Bi<sub>2</sub>I<sub>9</sub> single crystals. (a) The XPS survey of the crystal. (b)-(e) show the peaks of C, N, Bi, and I elements, respectively.

**Figure S6.** Crystal structure of MA<sub>3</sub>Bi<sub>2</sub>(Br<sub>0.62</sub>I<sub>0.38</sub>)<sub>9</sub> at room temperature. (a) presents the corner-shared connection of the [Bi(Br/I)<sub>6</sub>]<sup>3-</sup> anionic groups in the structural framework. (b) The quasi-two-dimensional structure of MA<sub>3</sub>Bi<sub>2</sub>(Br<sub>0.62</sub>I<sub>0.38</sub>)<sub>9</sub>. (c) Ball-and-stick diagrams of the [Bi(Br/I)<sub>6</sub>]<sup>3-</sup> octahedra with the bond-lengths labelled.

**Figure S7.** DSC measurements of (a) MA<sub>3</sub>Bi<sub>2</sub>(Br<sub>0.74</sub>I<sub>0.26</sub>)<sub>9</sub>, (b) MA<sub>3</sub>Bi<sub>2</sub>(Br<sub>0.62</sub>I<sub>0.38</sub>)<sub>9</sub>, and (c) MA<sub>3</sub>Bi<sub>2</sub>I<sub>9</sub> crystals within low-temperature range of the -120~20 °C, respectively.

**Figure S8.** Photos of the as-grown and aged (90 days) single crystals of MA<sub>3</sub>Bi<sub>2</sub>Br<sub>9</sub>, MA<sub>3</sub>Bi<sub>2</sub>(Br<sub>0.74</sub>I<sub>0.26</sub>)<sub>9</sub>, and MA<sub>3</sub>Bi<sub>2</sub>(Br<sub>0.62</sub>I<sub>0.38</sub>)<sub>9</sub>, with the environmental relative humidity of RH 80%, respectively.

**Figure S9.** Photoluminescence excitation spectrum of MA<sub>3</sub>Bi<sub>2</sub>Br<sub>9</sub>.

**Figure S10.** Mass attenuation coefficients of  $\text{MA}_3\text{Bi}_2\text{Br}_9$ ,  $\text{MA}_3\text{Bi}_2(\text{Br}_{0.62}\text{I}_{0.38})_9$ ,  $\text{MA}_3\text{Bi}_2\text{I}_9$ , and some other typical perovskite crystals. Insert present the detailed attenuation coefficients of the crystals.

**Table S1.** XPS results of the targeted  $\text{MA}_3\text{Bi}_2\text{X}_9$  single crystals.

**Table S2.** Atomic coordinates ( $\times 10^4$ ) and equivalent isotropic displacement parameters ( $\text{\AA}^2 \times 10^3$ ) for  $\text{MA}_3\text{Bi}_2\text{Br}_9$ .

**Table S3.** Atomic coordinates ( $\times 10^4$ ) and equivalent isotropic displacement parameters ( $\text{\AA}^2 \times 10^3$ ) for  $\text{MA}_3\text{Bi}_2(\text{Br}_{0.62}\text{I}_{0.38})_9$ .

**Table S4.** Bond lengths [ $\text{\AA}$ ] and angles [ $^\circ$ ] for  $\text{MA}_3\text{Bi}_2\text{Br}_9$ .

**Table S5.** Bond lengths [ $\text{\AA}$ ] and angles [ $^\circ$ ] for  $\text{MA}_3\text{Bi}_2(\text{Br}_{0.62}\text{I}_{0.38})_9$ .

**Table S6.** Anisotropic displacement parameters ( $\text{\AA}^2 \times 10^3$ ) for  $\text{MA}_3\text{Bi}_2\text{Br}_9$ .

**Table S7.** Anisotropic displacement parameters ( $\text{\AA}^2 \times 10^3$ ) for  $\text{MA}_3\text{Bi}_2(\text{Br}_{0.62}\text{I}_{0.38})_9$ .

**Table S8.** Bond valence of Bi cations and the distortion parameter  $\Delta d$  of  $[\text{BiBr}_6]^{3-}$  octahedra in  $\text{MA}_3\text{Bi}_2\text{Br}_9$ .

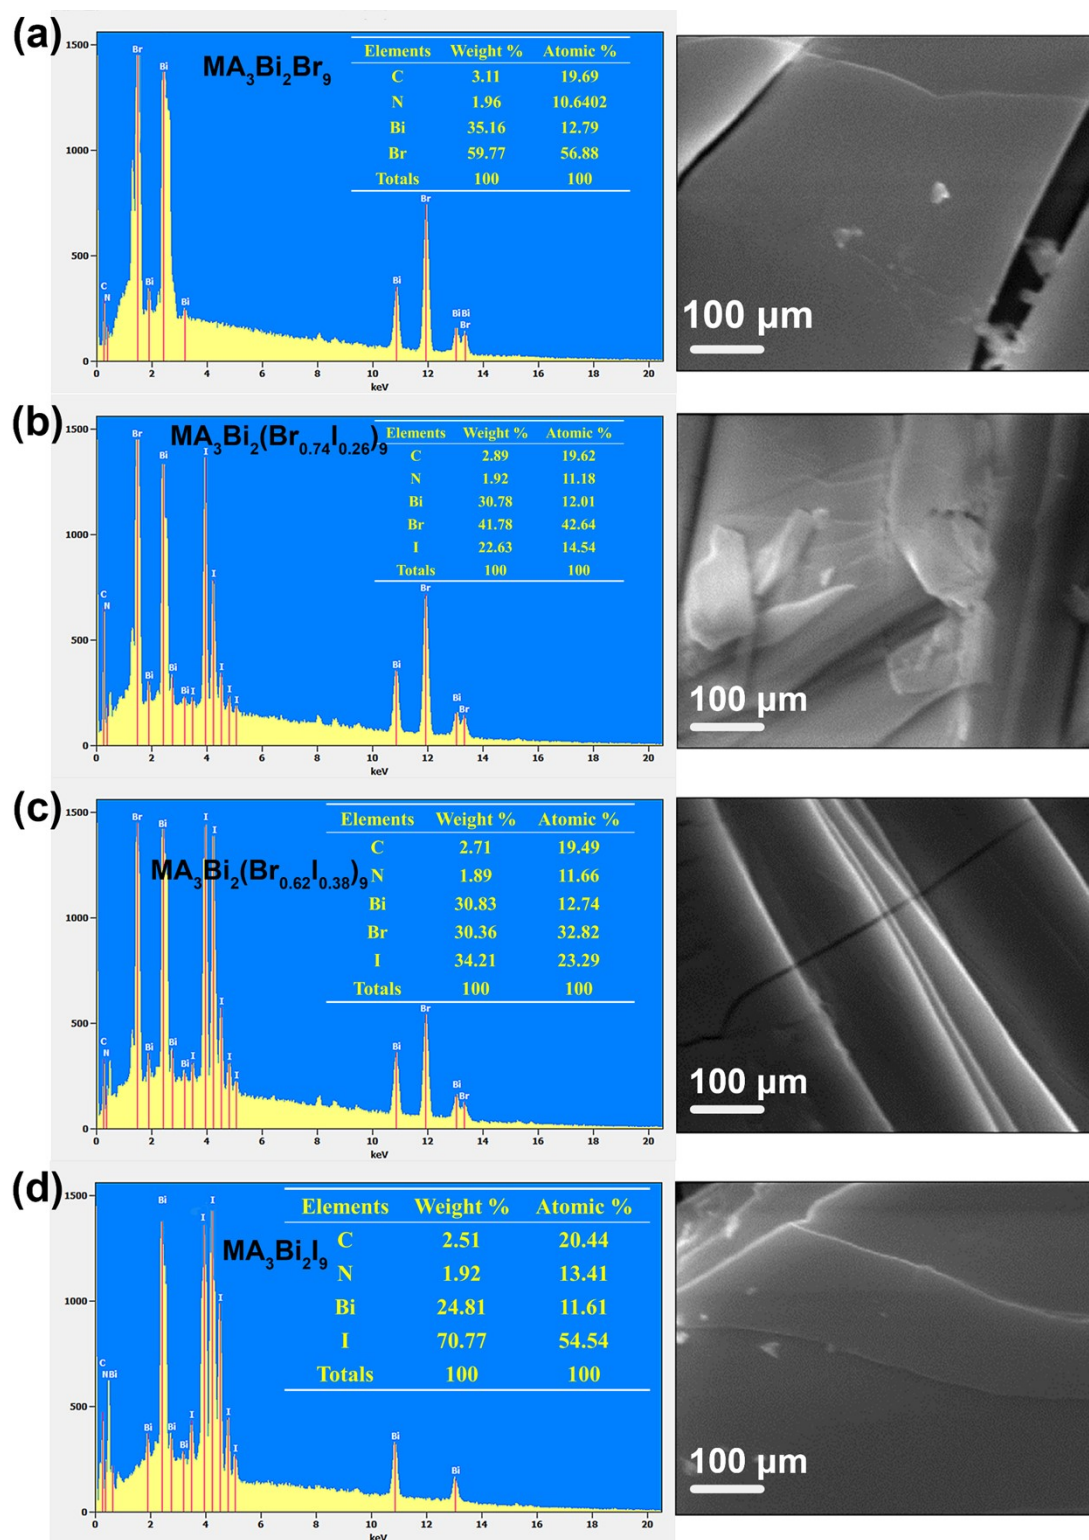

**Figure S1.** The EDS measurement results of (a) MA<sub>3</sub>Bi<sub>2</sub>Br<sub>9</sub>, (b) MA<sub>3</sub>Bi<sub>2</sub>(Br<sub>0.74</sub>I<sub>0.26</sub>)<sub>9</sub>, (c) MA<sub>3</sub>Bi<sub>2</sub>(Br<sub>0.62</sub>I<sub>0.38</sub>)<sub>9</sub>, and (d) MA<sub>3</sub>Bi<sub>2</sub>I<sub>9</sub>, respectively.

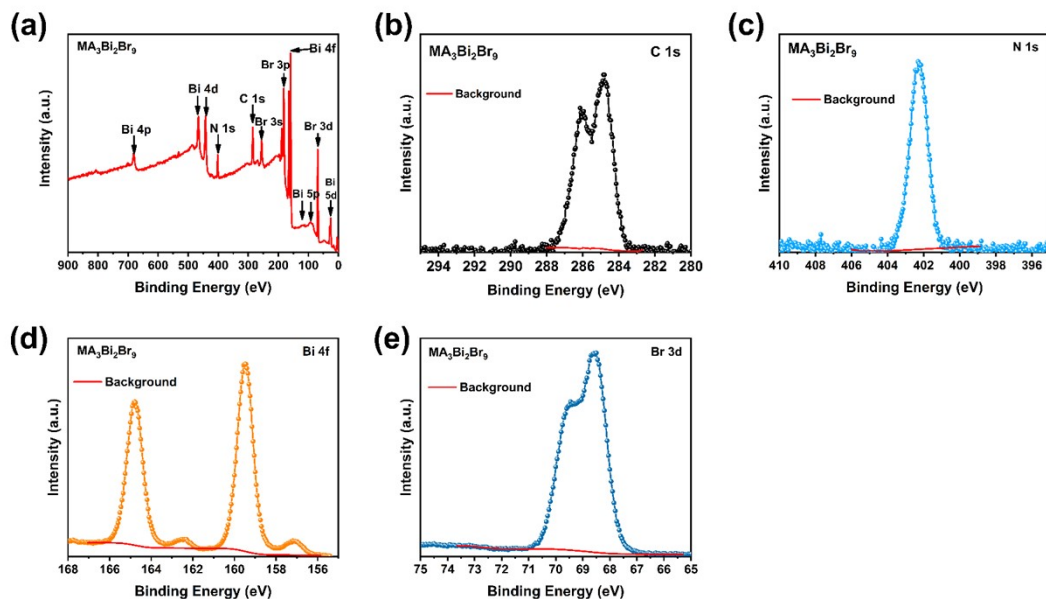

**Figure S2.** XPS measurement results of  $\text{MA}_3\text{Bi}_2\text{Br}_9$  single crystals. (a) The XPS survey of the crystal. (b)-(e) show the peaks of C, N, Bi, and Br elements, respectively.

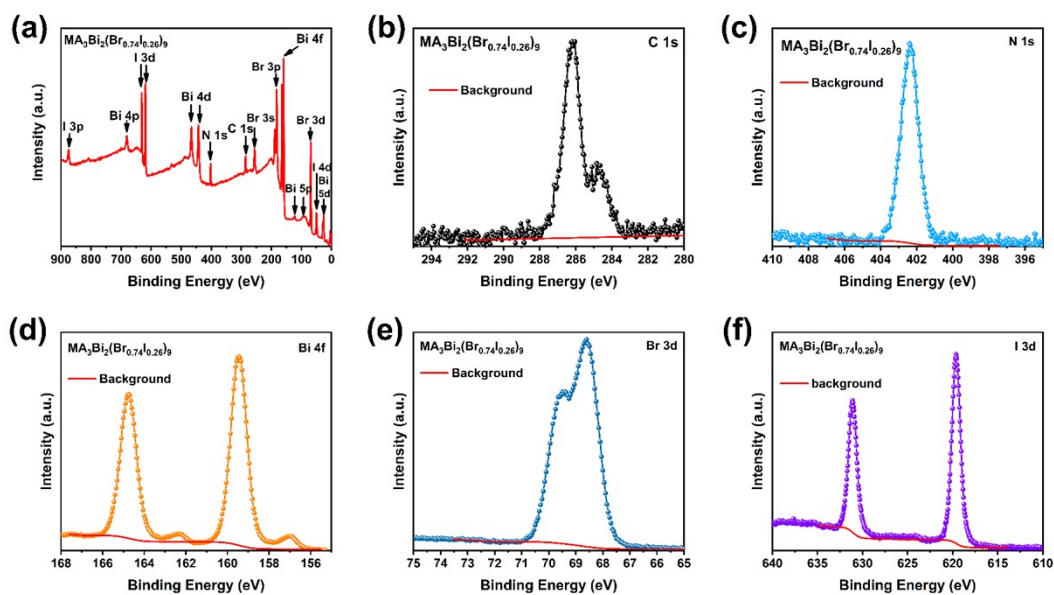

**Figure S3.** XPS measurement results of  $\text{MA}_3\text{Bi}_2(\text{Br}_{0.74}\text{I}_{0.26})_9$  single crystals. (a) The XPS survey of the crystal. (b)-(f) show the peaks of C, N, Bi, Br, and I elements, respectively.

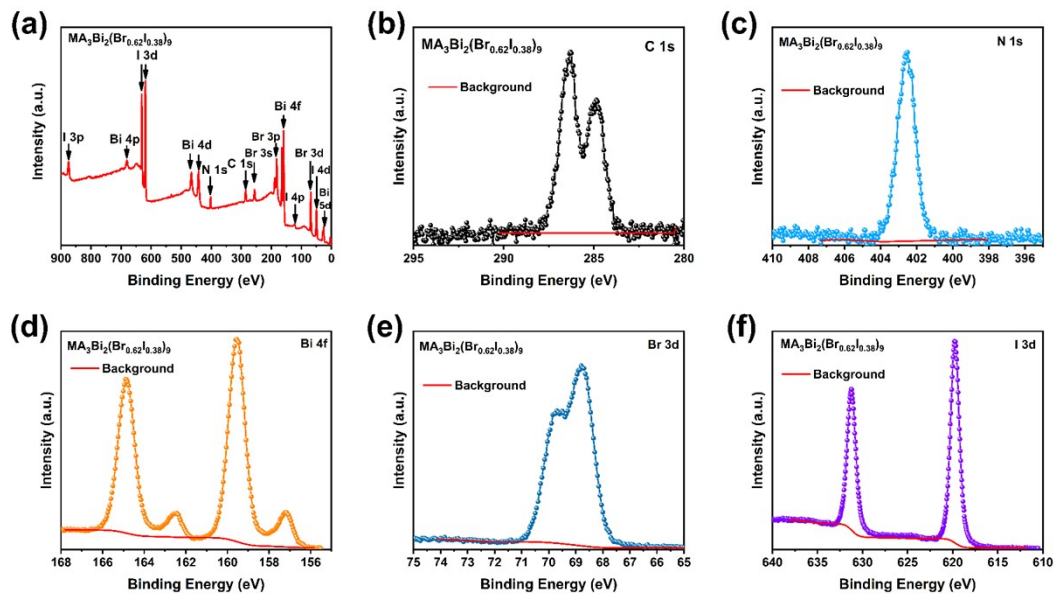

**Figure S4.** XPS measurement results of  $\text{MA}_3\text{Bi}_2(\text{Br}_{0.62}\text{I}_{0.38})_9$  single crystals. (a) The XPS survey of the crystal. (b)-(f) show the peaks of C, N, Bi, Br, and I elements, respectively.

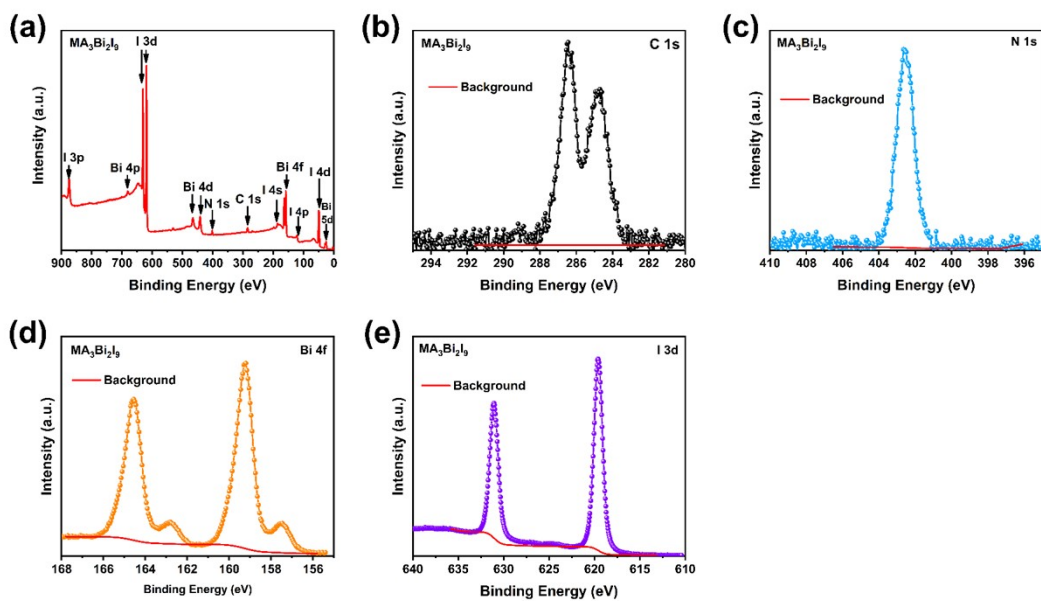

**Figure S5.** XPS measurement results of  $\text{MA}_3\text{Bi}_2\text{I}_9$  single crystals. (a) The XPS survey of the crystal. (b)-(e) show the peaks of C, N, Bi, and I elements, respectively.

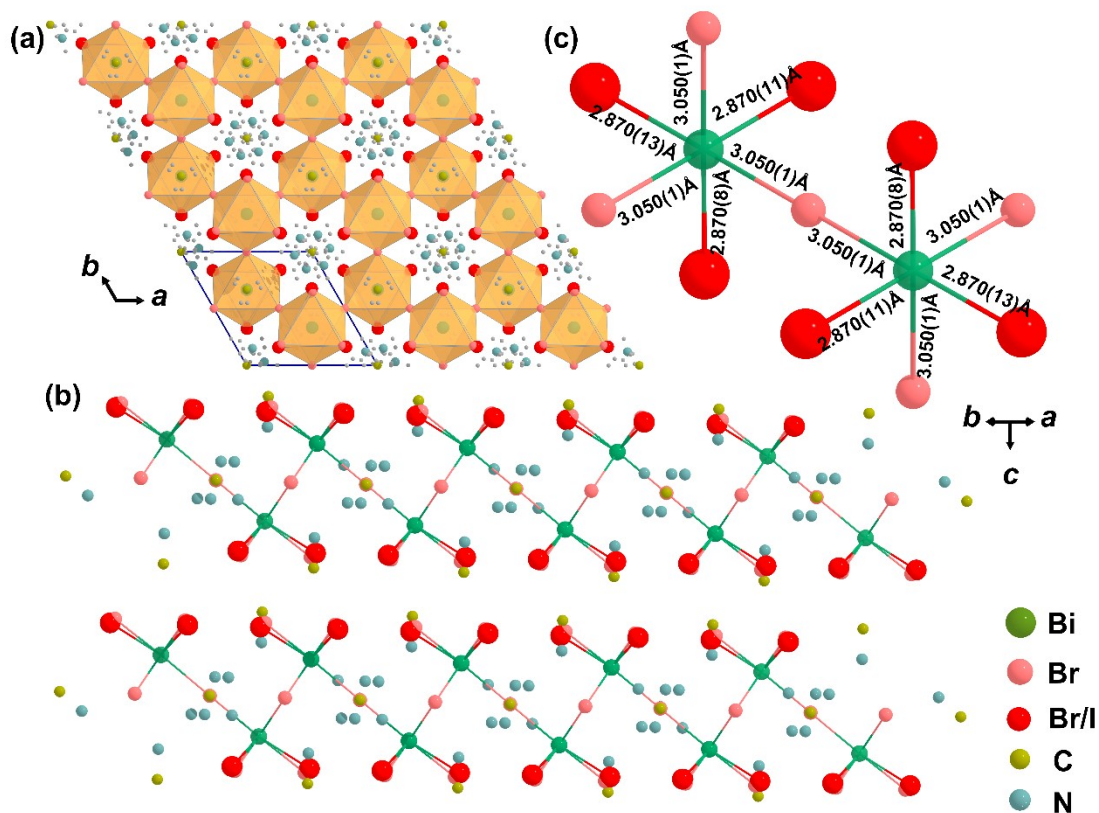

**Figure S6.** Crystal structure of  $\text{MA}_3\text{Bi}_2(\text{Br}_{0.62}\text{I}_{0.38})_9$  at room temperature. (a) presents the corner-shared connection of the  $[\text{Bi}(\text{Br}/\text{I})_6]^{3-}$  anionic groups in the structural framework. (b) The quasi-two-dimensional structure of  $\text{MA}_3\text{Bi}_2(\text{Br}_{0.62}\text{I}_{0.38})_9$ . (c) Ball-and-stick diagrams of the  $[\text{Bi}(\text{Br}/\text{I})_6]^{3-}$  octahedra with the bond-lengths labelled.

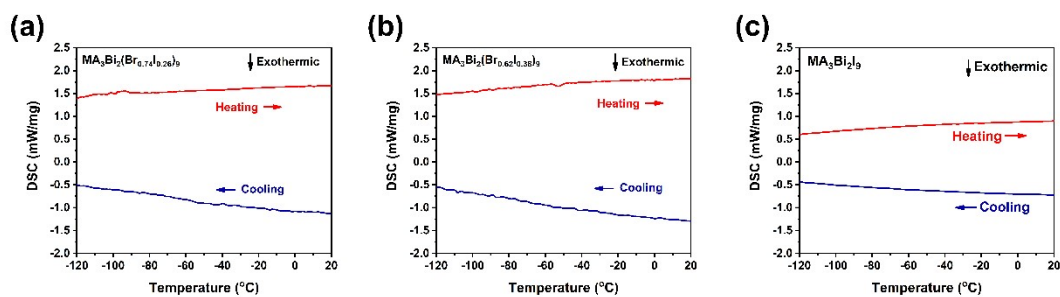

**Figure S7.** DSC measurements of (a)  $\text{MA}_3\text{Bi}_2(\text{Br}_{0.74}\text{I}_{0.26})_9$ , (b)  $\text{MA}_3\text{Bi}_2(\text{Br}_{0.62}\text{I}_{0.38})_9$ , and (c)  $\text{MA}_3\text{Bi}_2\text{I}_9$  crystals within low-temperature range of the  $-120\sim 20$  °C, respectively.

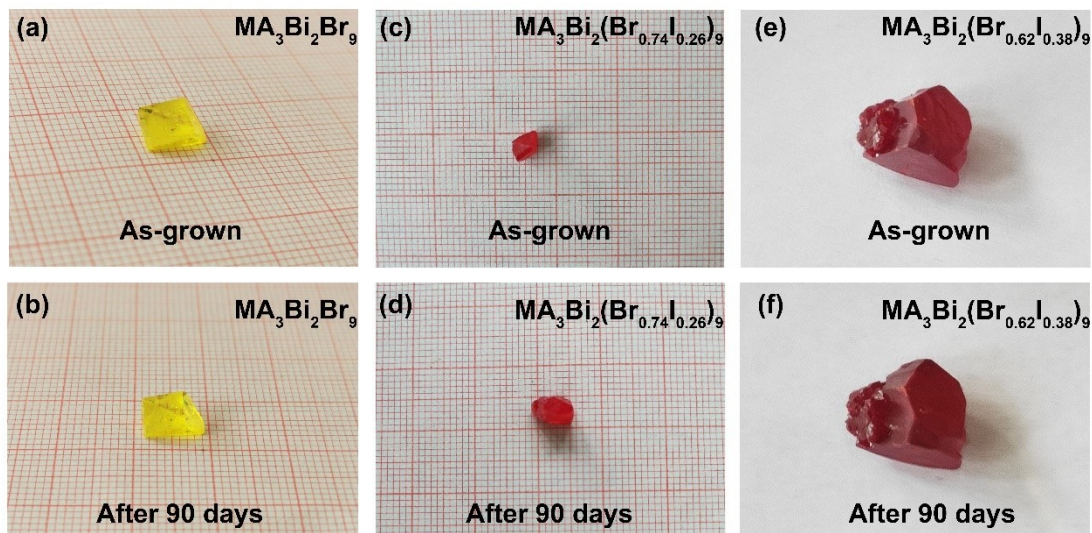

**Figure S8.** Photos of the as-grown and aged (90 days) single crystals of  $\text{MA}_3\text{Bi}_2\text{Br}_9$ ,  $\text{MA}_3\text{Bi}_2(\text{Br}_{0.74}\text{I}_{0.26})_9$ , and  $\text{MA}_3\text{Bi}_2(\text{Br}_{0.62}\text{I}_{0.38})_9$ , with the environmental relative humidity of RH 80%, respectively.

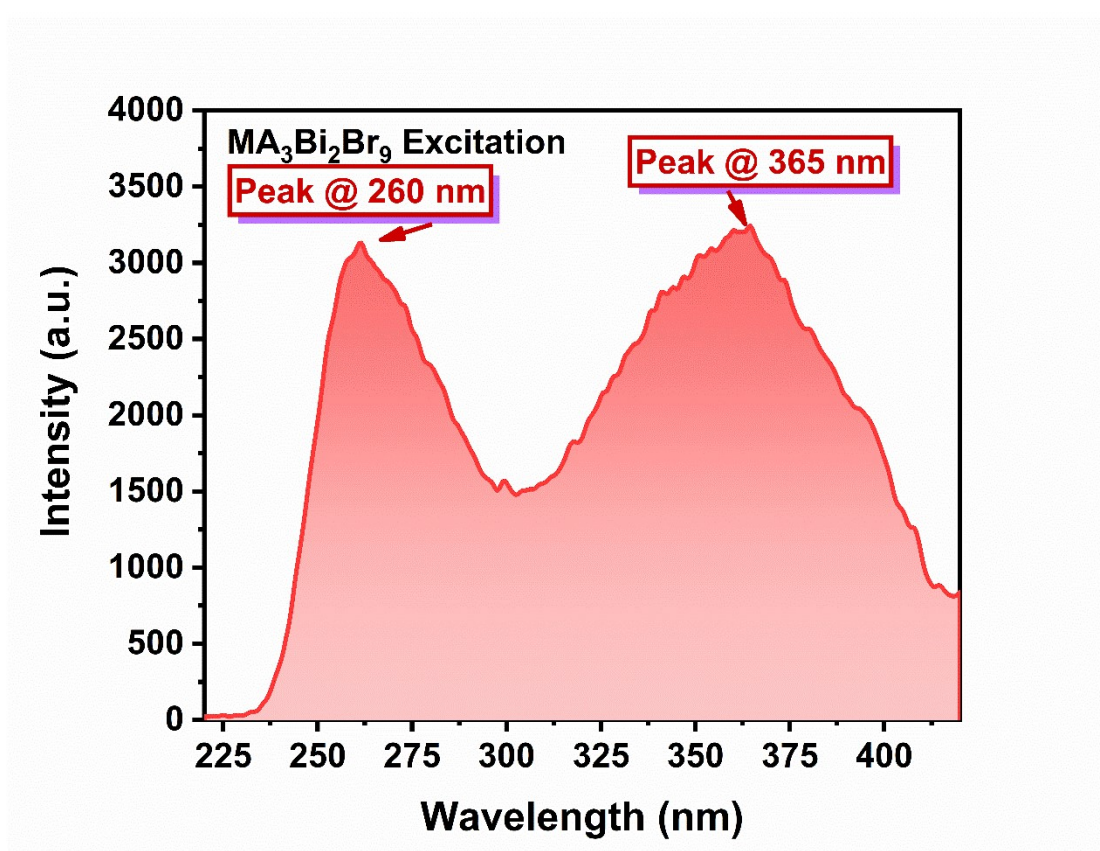

**Figure S9.** Photoluminescence excitation spectrum of  $\text{MA}_3\text{Bi}_2\text{Br}_9$ .

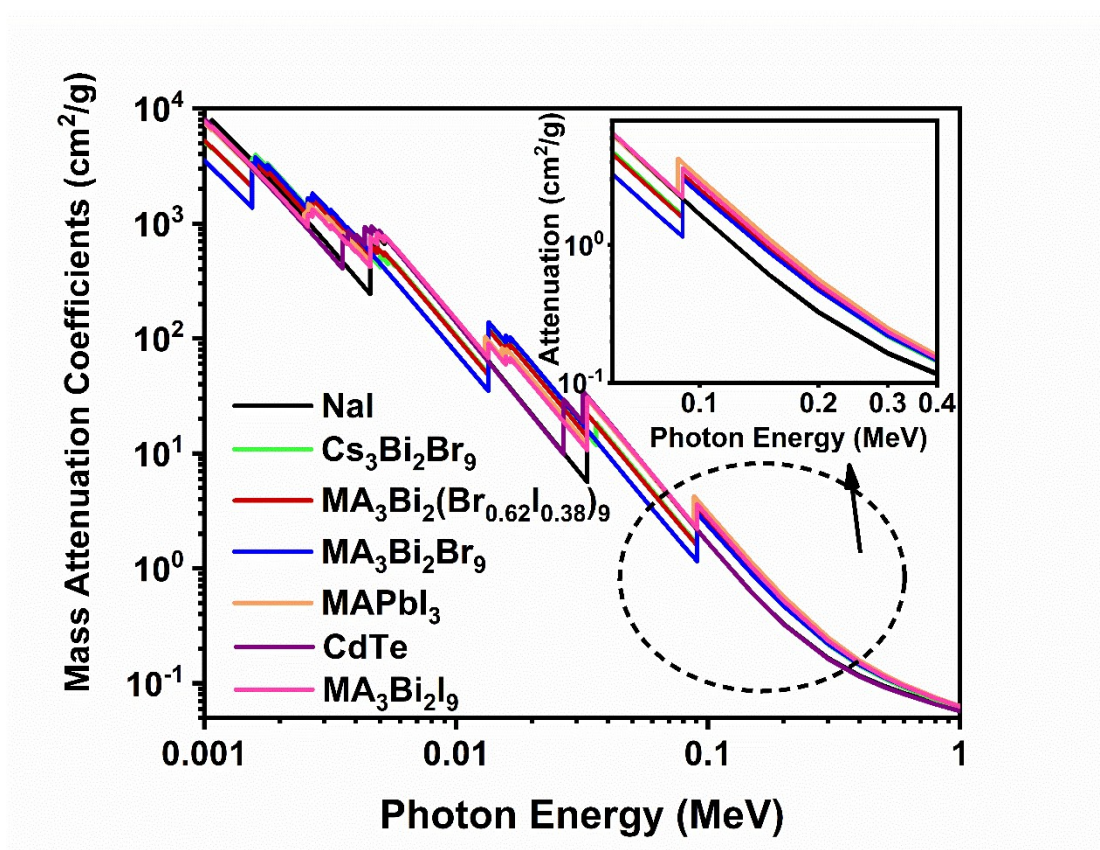

**Figure S10.** Mass attenuation coefficients of  $\text{MA}_3\text{Bi}_2\text{Br}_9$ ,  $\text{MA}_3\text{Bi}_2(\text{Br}_{0.62}\text{I}_{0.38})_9$ ,  $\text{MA}_3\text{Bi}_2\text{I}_9$ , and some other typical perovskite crystals. Insert present the detailed attenuation coefficients of the crystals.



**Table S1.** XPS results of the targeted MA<sub>3</sub>Bi<sub>2</sub>X<sub>9</sub> single crystals.

| XPS                                                                                  | C     | N     | Bi    | Br    | I     | SUM |
|--------------------------------------------------------------------------------------|-------|-------|-------|-------|-------|-----|
| MA <sub>3</sub> Bi <sub>2</sub> Br <sub>9</sub>                                      | 22.53 | 13.14 | 12.80 | 51.53 | 0     | 100 |
| MA <sub>3</sub> Bi <sub>2</sub> (Br <sub>0.74</sub> I <sub>0.26</sub> ) <sub>9</sub> | 24.04 | 13.21 | 11.47 | 38.75 | 12.53 | 100 |
| MA <sub>3</sub> Bi <sub>2</sub> (Br <sub>0.62</sub> I <sub>0.38</sub> ) <sub>9</sub> | 23.56 | 13.02 | 11.67 | 31.79 | 19.96 | 100 |
| MA <sub>3</sub> Bi <sub>2</sub> I <sub>9</sub>                                       | 21.44 | 11.47 | 13.07 | 54.02 | 0     | 100 |

**Table S2.** Atomic coordinates ( $\times 10^4$ ) and equivalent isotropic displacement parameters ( $\text{\AA}^2 \times 10^3$ ) for MA<sub>3</sub>Bi<sub>2</sub>Br<sub>9</sub>.

|       | <i>x</i>  | <i>y</i>   | <i>z</i>  | U(eq)   |
|-------|-----------|------------|-----------|---------|
| Bi(1) | 6667      | 3333       | 6823(1)   | 54(1)   |
| Br(1) | 8276(4)   | 6547(4)    | 8335(3)   | 92(1)   |
| Br(2) | 5000      | 5000       | 5000      | 119(2)  |
| C(1)  | 6500(300) | 2540(140)  | 2170(100) | 110(30) |
| N(2)  | 9600(300) | 10400(300) | 4470(80)  | 110(30) |
| N(1)  | 6900(200) | 4220(120)  | 1370(100) | 110(30) |
| C(2)  | 9000(200) | 11000(200) | 5650(110) | 120(30) |

$U_{(eq)}$  is defined as one third of the trace of the orthogonalized  $U^{ij}$  tensor.

**Table S3.** Atomic coordinates ( $\times 10^4$ ) and equivalent isotropic displacement parameters ( $\text{\AA}^2 \times 10^3$ ) for MA<sub>3</sub>Bi<sub>2</sub>(Br<sub>0.62</sub>I<sub>0.38</sub>)<sub>9</sub>.

|       | <i>x</i>  | <i>y</i> | <i>z</i>  | U(eq)   |
|-------|-----------|----------|-----------|---------|
| Bi(1) | 13333     | 6667     | 3169(1)   | 33(1)   |
| Br(1) | 15000     | 10000    | 5000      | 76(1)   |
| N(1)  | 13333     | 6667     | -1050(40) | 220(20) |
| C(1)  | 13333     | 6667     | -2460(40) | 210(20) |
| Br(2) | 11730(30) | 3550(20) | 1554(17)  | 59(1)   |
| I(2)  | 11638(16) | 3232(11) | 1750(9)   | 59(1)   |
| N(2)  | 10000     | 10000    | 5000      | 210(30) |
| C(2)  | 10309     | 8800     | 5876      | 210(40) |

$U_{(eq)}$  is defined as one third of the trace of the orthogonalized  $U^{ij}$  tensor.

**Table S4.** Bond lengths [ $\text{\AA}$ ] and angles [ $^\circ$ ] for  $\text{MA}_3\text{Bi}_2\text{Br}_9$ .

|                       |            |
|-----------------------|------------|
| Bi(1)-Br(1)#1         | 2.718(3)   |
| Bi(1)-Br(1)           | 2.718(3)   |
| Bi(1)-Br(1)#2         | 2.718(3)   |
| Bi(1)-Br(2)#2         | 2.9672(18) |
| Bi(1)-Br(2)#1         | 2.9672(18) |
| Bi(1)-Br(2)           | 2.9672(18) |
| C(1)-N(1)             | 1.458(10)  |
| N(2)-C(2)             | 1.462(10)  |
| Br(1)#1-Bi(1)-Br(1)   | 92.41(11)  |
| Br(1)#1-Bi(1)-Br(1)#2 | 92.41(11)  |
| Br(1)-Bi(1)-Br(1)#2   | 92.41(11)  |
| Br(1)#1-Bi(1)-Br(2)#2 | 90.39(8)   |
| Br(1)-Bi(1)-Br(2)#2   | 175.91(8)  |
| Br(1)#2-Bi(1)-Br(2)#2 | 90.45(8)   |
| Br(1)#1-Bi(1)-Br(2)#1 | 90.45(8)   |
| Br(1)-Bi(1)-Br(2)#1   | 90.39(8)   |
| Br(1)#2-Bi(1)-Br(2)#1 | 175.91(8)  |
| Br(2)#2-Bi(1)-Br(2)#1 | 86.61(6)   |
| Br(1)#1-Bi(1)-Br(2)   | 175.91(8)  |
| Br(1)-Bi(1)-Br(2)     | 90.45(8)   |
| Br(1)#2-Bi(1)-Br(2)   | 90.39(8)   |
| Br(2)#2-Bi(1)-Br(2)   | 86.61(6)   |
| Br(2)#1-Bi(1)-Br(2)   | 86.61(6)   |
| Bi(1)#3-Br(2)-Bi(1)   | 180        |

Symmetry transformations used to generate equivalent atoms:

#1  $-x+y+1, -x+1, z$  #2  $-y+1, x-y, z$  #3  $-x+1, -y+1, -z+1$

**Table S5.** Bond lengths [ $\text{\AA}$ ] and angles [ $^\circ$ ] for  $\text{MA}_3\text{Bi}_2(\text{Br}_{0.62}\text{I}_{0.38})_9$ .

|               |           |
|---------------|-----------|
| Bi(1)-Br(2)#1 | 2.795(18) |
| Bi(1)-Br(2)   | 2.795(19) |
| Bi(1)-Br(2)#2 | 2.795(19) |
| Bi(1)-I(2)#2  | 2.870(9)  |
| Bi(1)-I(2)    | 2.870(9)  |
| Bi(1)-I(2)#1  | 2.870(9)  |
| Bi(1)-Br(1)   | 3.0502(6) |
| Bi(1)-Br(1)#2 | 3.0502(6) |
| Bi(1)-Br(1)#1 | 3.0502(6) |
| N(1)-C(1)     | 1.458(10) |

---

|                       |            |
|-----------------------|------------|
| N(2)-C(2)             | 1.4592(2)  |
| Br(2)#1-Bi(1)-Br(2)   | 88.1(4)    |
| Br(2)#1-Bi(1)-Br(2)#2 | 88.1(4)    |
| Br(2)-Bi(1)-Br(2)#2   | 88.1(4)    |
| Br(2)#1-Bi(1)-I(2)#2  | 91.6(5)    |
| Br(2)-Bi(1)-I(2)#2    | 93.2(6)    |
| Br(2)#2-Bi(1)-I(2)#2  | 6.0(4)     |
| I(2)#2-Bi(1)-I(2)     | 96.3(2)    |
| Br(2)#1-Bi(1)-I(2)#1  | 6.0(4)     |
| Br(2)-Bi(1)-I(2)#1    | 91.6(5)    |
| Br(2)#2-Bi(1)-I(2)#1  | 93.2(6)    |
| I(2)#2-Bi(1)-I(2)#1   | 96.3(2)    |
| I(2)-Bi(1)-I(2)#1     | 96.3(2)    |
| Br(2)#1-Bi(1)-Br(1)   | 92.5(4)    |
| Br(2)-Bi(1)-Br(1)     | 178.2(4)   |
| Br(2)#2-Bi(1)-Br(1)   | 93.6(4)    |
| I(2)#2-Bi(1)-Br(1)    | 88.5(2)    |
| I(2)-Bi(1)-Br(1)      | 172.41(17) |
| I(2)#1-Bi(1)-Br(1)    | 88.9(2)    |
| Br(2)#1-Bi(1)-Br(1)#2 | 93.6(4)    |
| Br(2)-Bi(1)-Br(1)#2   | 92.5(4)    |
| Br(2)#2-Bi(1)-Br(1)#2 | 178.2(4)   |
| I(2)#2-Bi(1)-Br(1)#2  | 172.41(17) |
| I(2)-Bi(1)-Br(1)#2    | 88.9(2)    |
| I(2)#1-Bi(1)-Br(1)#2  | 88.5(2)    |
| Br(1)-Bi(1)-Br(1)#2   | 85.753(19) |
| Br(2)#1-Bi(1)-Br(1)#1 | 178.2(3)   |
| Br(2)-Bi(1)-Br(1)#1   | 93.6(4)    |
| Br(2)#2-Bi(1)-Br(1)#1 | 92.5(4)    |
| Br(1)-Bi(1)-Br(1)#1   | 85.753(19) |
| Br(1)#2-Bi(1)-Br(1)#1 | 85.753(19) |
| Bi(1)-Br(1)-Bi(1)#3   | 180        |

---

Symmetry transformations used to generate equivalent atoms:

#1 -x+y+2, -x+2, z    #2 -y+2, x-y, z    #3 -x+3, -y+2, -z+1

**Table S6.** Anisotropic displacement parameters ( $\text{\AA}^2 \times 10^3$ ) for  $\text{MA}_3\text{Bi}_2\text{Br}_9$ .

|       | $U^{11}$ | $U^{22}$ | $U^{33}$ | $U^{23}$ | $U^{13}$ | $U^{12}$ |
|-------|----------|----------|----------|----------|----------|----------|
| Bi(1) | 47(1)    | 47(1)    | 68(1)    | 0        | 0        | 23(1)    |
| Br(1) | 94(2)    | 71(2)    | 103(2)   | -33(1)   | -16(2)   | 35(1)    |
| Br(2) | 121(3)   | 119(3)   | 146(4)   | 17(3)    | -17(3)   | 81(3)    |
| C(1)  | 110(30)  | 110(30)  | 100(40)  | 9(16)    | -1(17)   | 50(20)   |
| N(2)  | 110(40)  | 110(40)  | 120(30)  | 9(16)    | -10(16)  | 60(20)   |
| N(1)  | 110(30)  | 110(30)  | 110(30)  | 8(16)    | 0(17)    | 50(20)   |
| C(2)  | 120(40)  | 120(40)  | 120(30)  | 7(16)    | -7(16)   | 50(20)   |

The anisotropic displacement factor exponent takes the form:  $-2\pi^2[h^2a^{*2}U^{11} + \dots + 2hka^*b^*U^{12}]$

**Table S7.** Anisotropic displacement parameters ( $\text{\AA}^2 \times 10^3$ ) for  $\text{MA}_3\text{Bi}_2(\text{Br}_{0.62}\text{I}_{0.38})_9$ .

|       | $U^{11}$ | $U^{22}$ | $U^{33}$ | $U^{23}$ | $U^{13}$ | $U^{12}$ |
|-------|----------|----------|----------|----------|----------|----------|
| Bi(1) | 30(1)    | 30(1)    | 39(1)    | 0        | 0        | 15(1)    |
| Br(1) | 88(2)    | 47(1)    | 81(2)    | -30(1)   | -15(1)   | 24(1)    |
| N(1)  | 210(20)  | 210(20)  | 230(30)  | 0        | 0        | 107(11)  |
| C(1)  | 210(20)  | 210(20)  | 210(30)  | 0        | 0        | 104(11)  |
| Br(2) | 72(1)    | 37(3)    | 61(3)    | -7(2)    | -6(2)    | 21(2)    |
| I(2)  | 72(1)    | 37(3)    | 61(3)    | -7(2)    | -6(2)    | 21(2)    |
| N(2)  | 210(40)  | 210(40)  | 210(40)  | -10(30)  | 10(30)   | 100(30)  |
| C(2)  | 210(40)  | 210(50)  | 210(40)  | -10(30)  | 10(30)   | 100(30)  |

The anisotropic displacement factor exponent takes the form:  $-2\pi^2[h^2a^{*2}U^{11} + \dots + 2hka^*b^*U^{12}]$

**Table S8.** Bond valence of Bi cations and the distortion parameter  $\Delta d$  of  $[\text{BiBr}_6]^{3-}$  octahedra in  $\text{MA}_3\text{Bi}_2\text{Br}_9$ .

|                  | Bond length ( $\text{\AA}$ ) | Bond valence | Bond angle ( $^\circ$ ) | $\Delta d$ parameter |
|------------------|------------------------------|--------------|-------------------------|----------------------|
| Bi-Br1           | 2.718(4)                     | 0.766        | 175.9                   | 0.75                 |
| Bi-Br2           | 2.967(2)                     | 0.391        |                         |                      |
| Bi-Br1           | 2.718(4)                     | 0.766        | 175.9                   |                      |
| Bi-Br2           | 2.967(2)                     | 0.391        |                         |                      |
| Bi-Br1           | 2.718(4)                     | 0.766        | 175.9                   |                      |
| Bi-Br2           | 2.967(2)                     | 0.391        |                         |                      |
| <b>BVS=3.474</b> |                              |              |                         |                      |
